# Supplementary material for: A rhodium(ii)/rhodium(iii) redox couple for C–H bond amination with alkylazides: a rhodium(iii)–nitrenoid intermediate with a tetradentate [14]-macrocyclic ligand
Source: Royal Society of Chemistry journal article supplement (doi:10.1039/d3dt03429a), 2024-01-01
Supplement: d3dt03429a1.pdf [file d3dt03429a1.pdf]

## Supplementary Information

### **Rhodium(II)/Rhodium(III) Redox Couple for C–H Bond Amination with Alkylazides: a Rhodium(III)-nitrenoid Intermediate with a Tetradentate [14]-Macrocyclic Ligand**

Hideki Sugimoto,<sup>\*†</sup> Sakaida Megumu,<sup>†</sup> Yoshihito Shiota,<sup>‡</sup> Mayuko Miyanishi,<sup>‡</sup> Yuma Morimoto,<sup>†</sup> Kazunari Yoshizawa,<sup>\*‡</sup> and Shinobu Itoh<sup>\*†</sup>

<sup>[†]</sup> *Department of Material and Life Science, Division of Advanced Science and Biotechnology, Graduate School of Engineering, Osaka University, 2-1 Yamadaoka, Suita, Osaka 565-0871, Japan*

<sup>[‡]</sup> *Institute for Materials Chemistry and Engineering and International Research Center for Molecular System, Kyushu University, 744 Motoooka, Nishi-ku, Fukuoka, 819-0395, Japan*

\* Corresponding Author, E-mail: [sugimoto@chem.eng.osaka-u.ac.jp](mailto:sugimoto@chem.eng.osaka-u.ac.jp), [kazunari@ms.ifoc.kyushu-u.ac.jp](mailto:kazunari@ms.ifoc.kyushu-u.ac.jp), [shinobu@chem.eng.osaka-u.ac.jp](mailto:shinobu@chem.eng.osaka-u.ac.jp)

## Contents:

Page S3: *Fig. S1.* Intermolecular interaction of **2<sup>CH<sub>3</sub>CN</sup>** (a) and **2<sup>Py</sup>** (b). Hydrogen atoms, counter anions, and solvent molecules are omitted for clarity.

Page S4: *Fig. S2.* IR spectrum of a reaction solution of [Rh(TMAA)]<sub>2</sub> and 2 equiv of N<sub>3</sub>-Trs in toluene.

Page S5: *Fig. S3.* IR spectrum of a reaction solution of [Rh(TMAA)]<sub>2</sub> and 2 equiv of N<sub>3</sub>-Ns in toluene.

Page S6: *Fig. S4.* An ESI-mass spectrum of a reaction solution of [Rh(TMAA)]<sub>2</sub> with N<sub>3</sub>-CH<sub>2</sub>Ph in toluene.

Page S7: *Fig. S5.* DFT optimized structure of **2<sup>N•Ns</sup>** with spin distribution.

Page S8: *Fig. S6.* Time dependent yields of sultam.

Page S9: *Fig. S7.* <sup>1</sup>H-NMR spectrum of sultam.

Page S10: *Fig. S8.* <sup>1</sup>H-NMR spectrum of obtained solid by a reaction of 1-azido-4-phenylbutane and (Boc)<sub>2</sub>O in the presence of [Rh(TAMM)]<sub>2</sub> (5% mol) at 100 °C for 24 h.

Page S11: *Fig. S9.* <sup>1</sup>H-NMR spectrum of obtained solid by a reaction of benzyl-2-azidoethyl-ether and (Boc)<sub>2</sub>O in the presence of [Rh(TAMM)]<sub>2</sub> (5% mol) at 100 °C for 24 h.

Page S12: *Fig. S10.* <sup>1</sup>H-NMR spectrum of obtained solid by a reaction of xanthene and benzylazide in the presence of [Rh(TAMM)]<sub>2</sub> (5% mol) at 100 °C for 24 h.

Page S13: *Fig. S11.* <sup>1</sup>H-NMR spectrum of obtained solid by a reaction of xanthene and 4-nitro-phenylazide in the presence of [Rh(TAMM)]<sub>2</sub> (5% mol) at 100 °C for 24 h. A peak around 6 ppm is due to the internal standard (1,1,2,2-tetrachloroethane).

Page S14: *Fig. S12.* <sup>1</sup>H-NMR spectrum of obtained solid by a reaction of xanthene, xanthene-*d*<sub>2</sub> (1 : 1), and 4-nitro-phenylazide in the presence of [Rh(TAMM)]<sub>2</sub> (5% mol) at 100 °C for 24 h.

Page S15: *Table S1.* Crystallographic data of **2<sup>CH<sub>3</sub>CN</sup>** and **2<sup>py</sup>**.

Pages S16-S40: *Tables S2 – S11.* Cartesian coordinates of optimized structures.

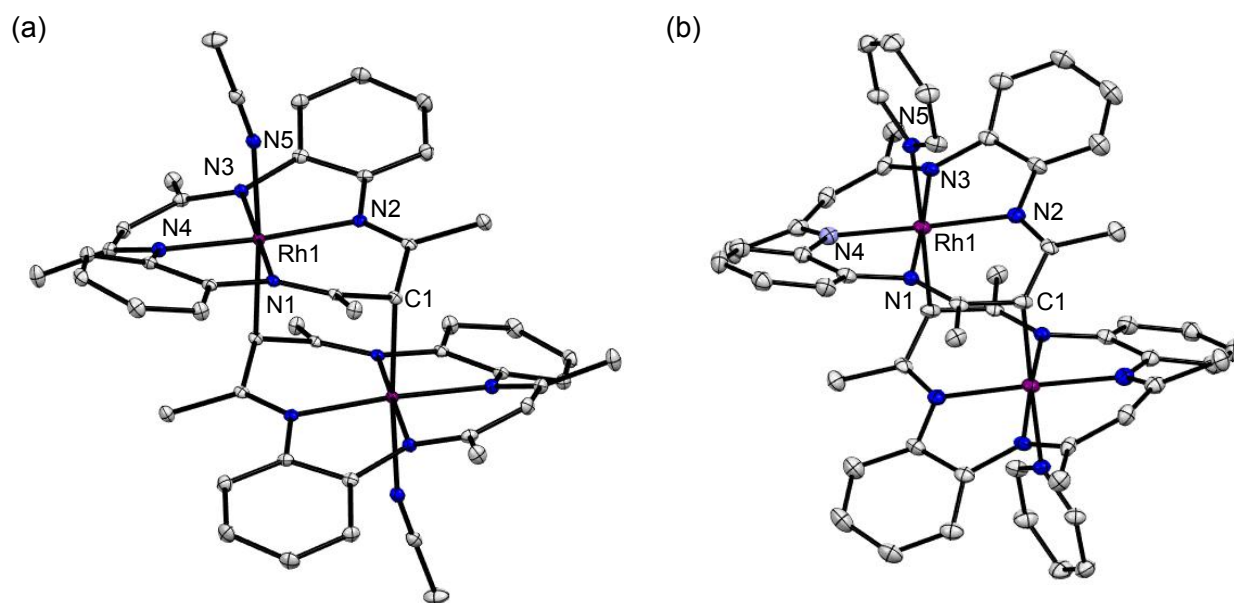

**Fig. S1** Intermolecular interaction of  $2^{\text{CH}_3\text{CN}}$  (a) and  $2^{\text{Py}}$  (b). Hydrogen atoms, counter anions, and solvent molecules are omitted for clarity.

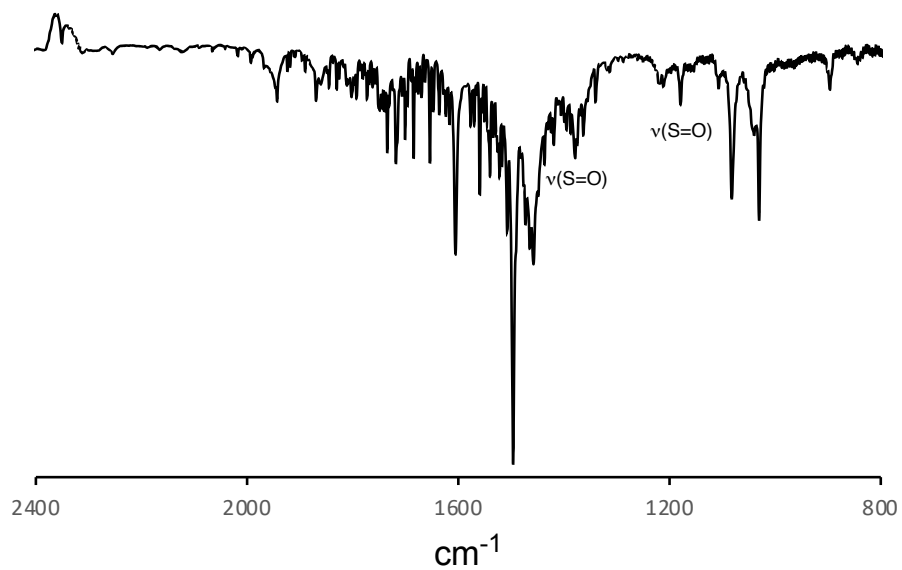

**Fig. S2** IR spectrum of a reaction solution of  $[\text{Rh}(\text{TMAA})]_2$  and 2 equiv of  $\text{N}_3\text{-Trs}$  in toluene.

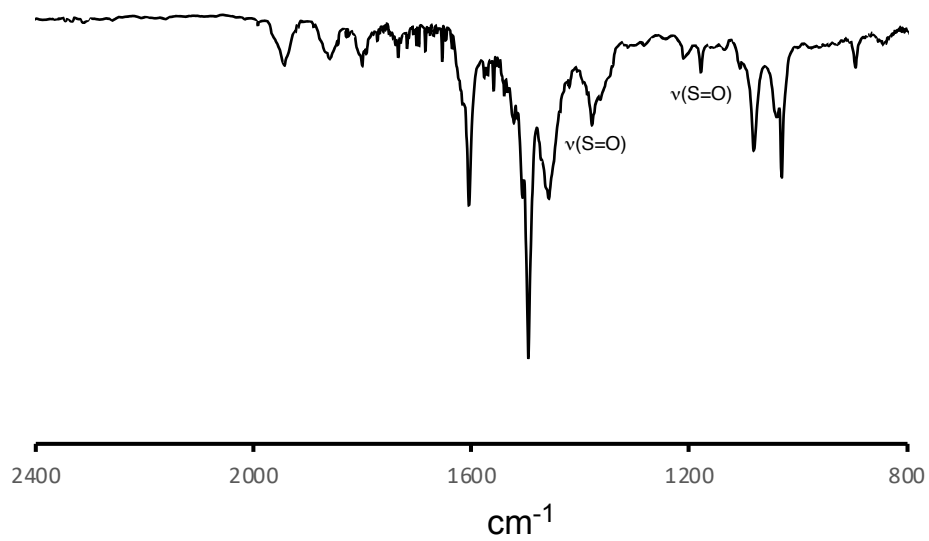

**Fig. S3** IR spectrum of a reaction solution of  $[\text{Rh}(\text{TMAA})_2]$  and 2 equiv of  $\text{N}_3\text{-Ns}$  in toluene.

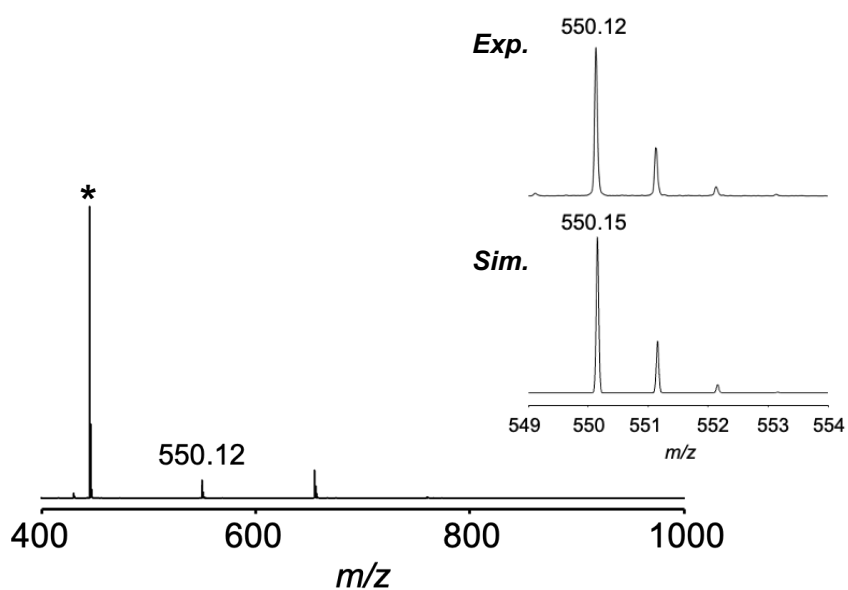

**Fig. S4** An ESI-mass spectrum of a reaction solution of  $[\text{Rh}(\text{TMAA})]_2$  with  $\text{N}_3\text{-CH}_2\text{Ph}$  in toluene. Inset: an expanded spectrum at around  $m/z = 550.12$  and a simulation spectrum for  $[\text{Rh}(\text{N-CH}_2\text{Ph})(\text{TMAA})]$ . A peak cluster marked with \* corresponds to  $[\text{Rh}(\text{TMAA})]$ .

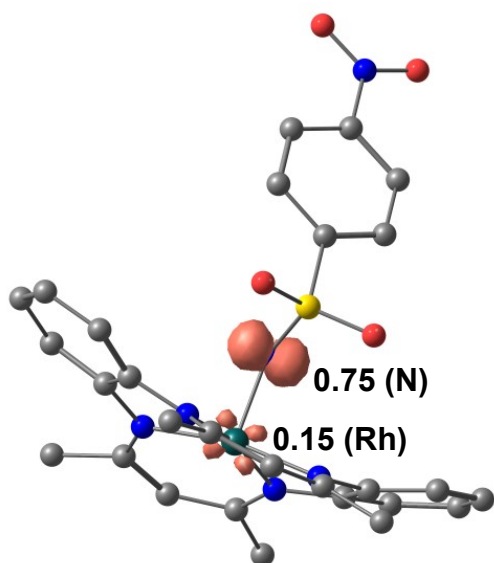

**Fig. S5** DFT calculated structure of [Rh(N•Ns)(TMAA)] (2N•Ns) and the spin density plot.

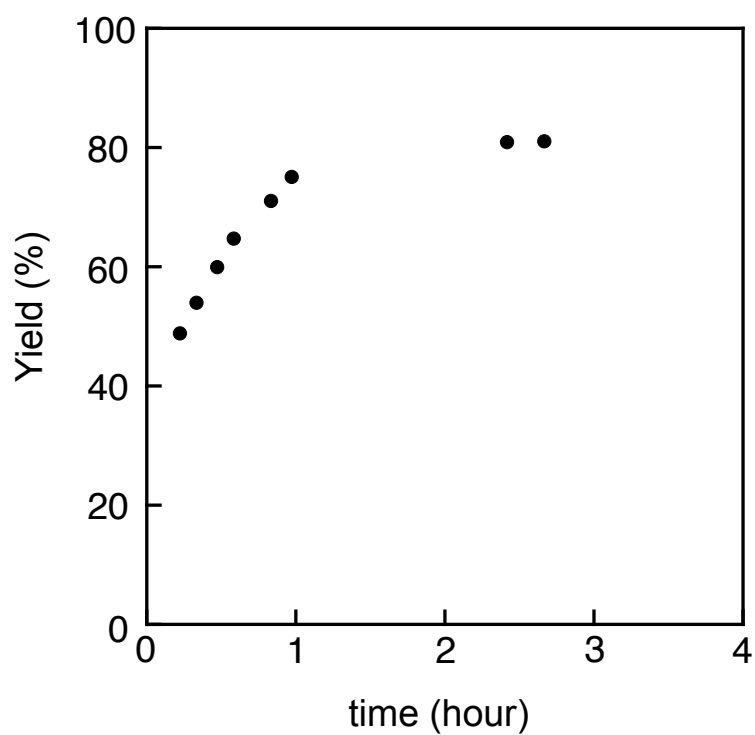

**Fig. S6** Plot of yields of sultam against reaction times in a catalytic amination of N<sub>3</sub>-Trs (70 μmol) in the presence of [Rh(TMAA)]<sub>2</sub> (3.5 μmol) in toluene.



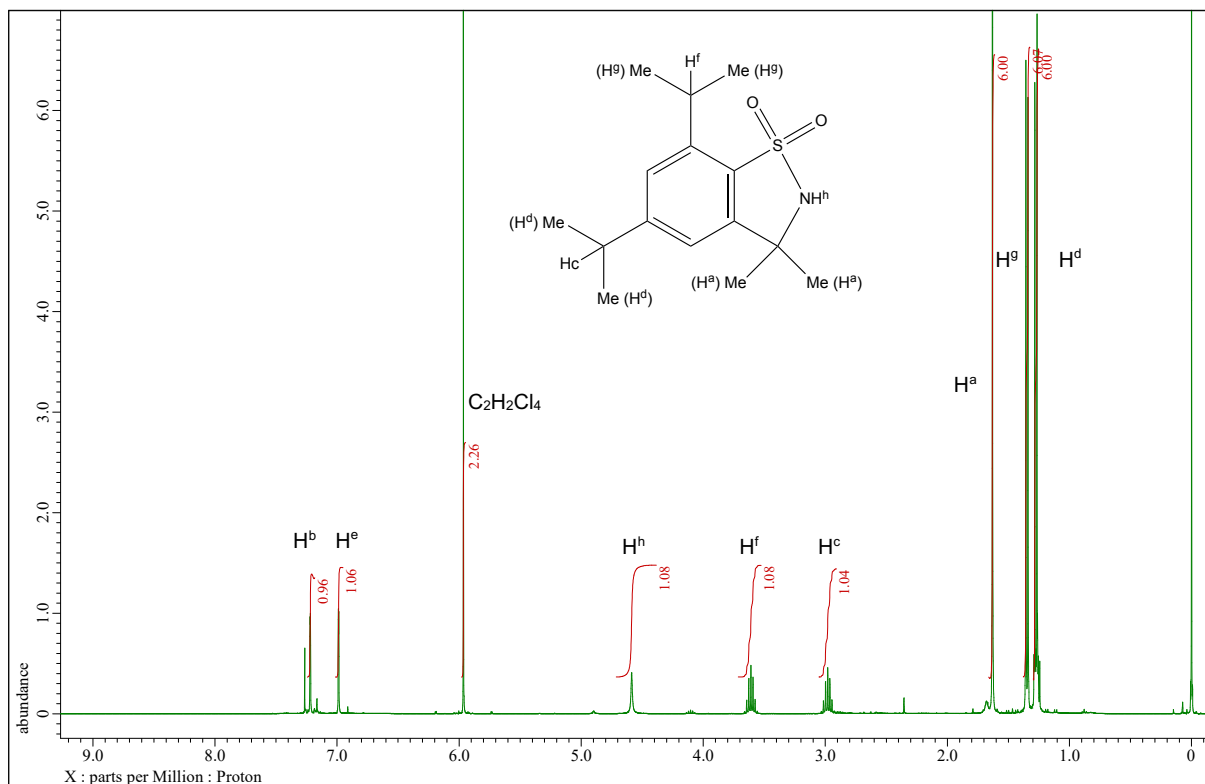

**Fig. S7** <sup>1</sup>H-NMR spectrum of sultam obtained from trisylazide in the presence of [Rh(TAMM)]<sub>2</sub> (5% mol) at 100 °C for 24 h. A peak around 6 ppm is due to the internal standard (1,1,2,2-tetrachloroethane). H<sup>a</sup> ~ H<sup>h</sup> were assigned by comparing chemical shifts of those reported in literature (J. V. Ruppel, R. M. Kamble and X. P. Zhang, *Org. Lett.*, 2007, **9**, 4889).

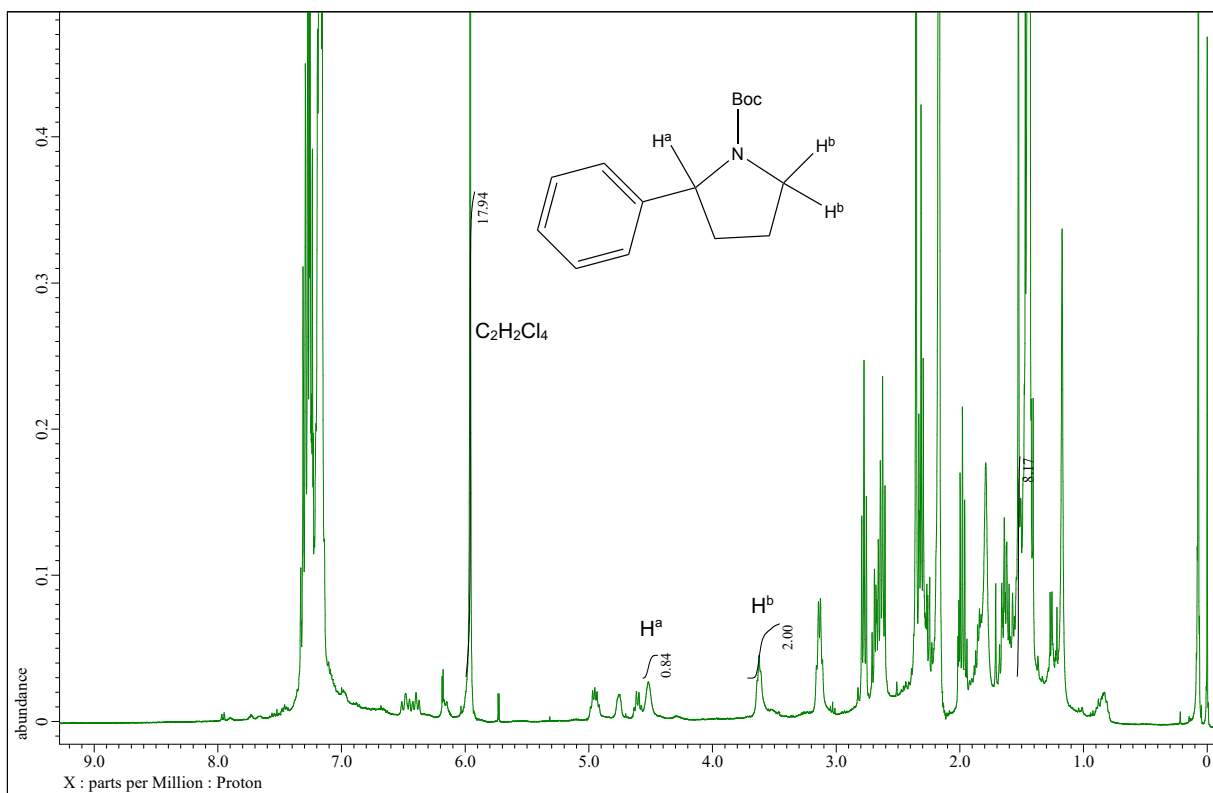

**Fig. S8**  $^1\text{H-NMR}$  spectrum of obtained solid by a reaction of 1-azido-4-phenylbutane and  $(\text{Boc})_2\text{O}$  in the presence of  $[\text{Rh}(\text{TAMM})_2]$  (5% mol) at 100 °C for 24 h. A peak around 6 ppm is due to the internal standard (1,1,2,2-tetrachloroethane).  $\text{H}^a$  and  $\text{H}^b$  were assigned by comparing chemical shifts of those reported in literature (E. T. Hennessy and T. A. Betley, *Science*, 2013, **340**, 591).

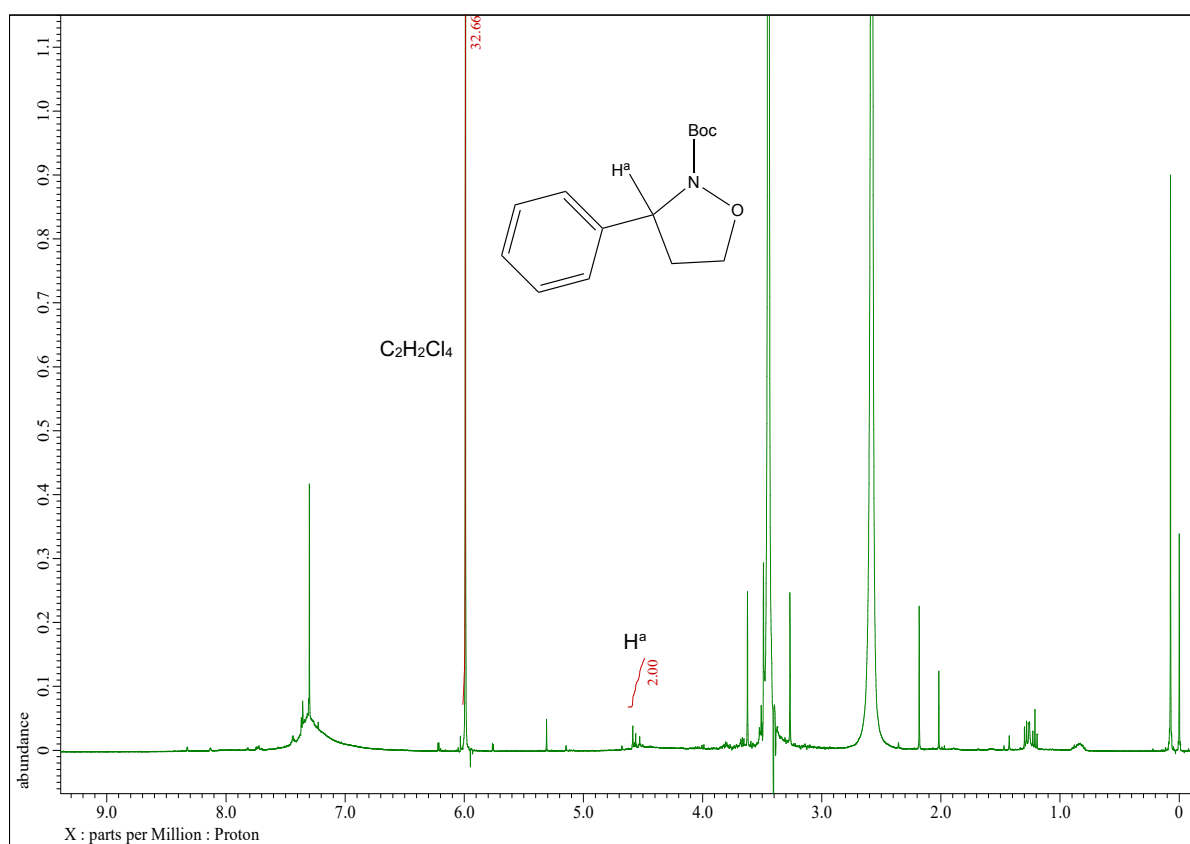

**Fig. S9** <sup>1</sup>H-NMR spectrum of obtained solid by a reaction of benzyl-2-azidoethyl-ether and (Boc)<sub>2</sub>O in the presence of [Rh(TAMM)]<sub>2</sub> (5% mol) at 100 °C for 24 h. A peak around 6 ppm is due to the internal standard (1,1,2,2-tetrachloroethane).  $H^a$  was assigned by comparing a chemical shift of that reported in literature (E. T. Hennessy and T. A. Betley, *Science*, 2013, **340**, 591).

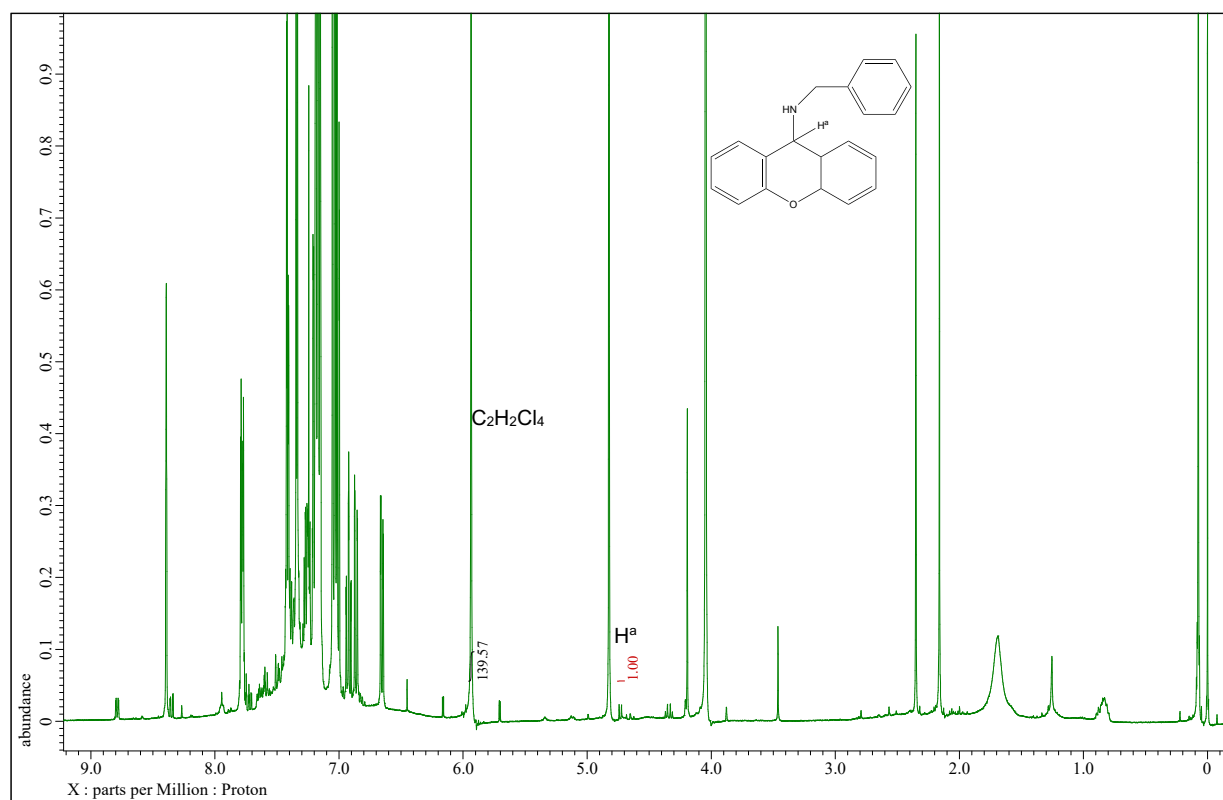

**Fig. S10**  $^1\text{H-NMR}$  spectrum of obtained solid by a reaction of xanthene and benzylazide in the presence of  $[\text{Rh}(\text{TAMM})_2]$  (5% mol) at 100 °C for 24 h. A peak around 6 ppm is due to the internal standard (1,1,2,2-tetrachloroethane).  $\text{H}_a$  was assigned by comparing a chemical shift of methine proton of *N*-(diphenylmethyl)methylamine reported in literature (S. Cicchi, M. Bonanni, F. Cardona and J. Revuelta, *Org. Lett.*, 2003, **5**, 1773).

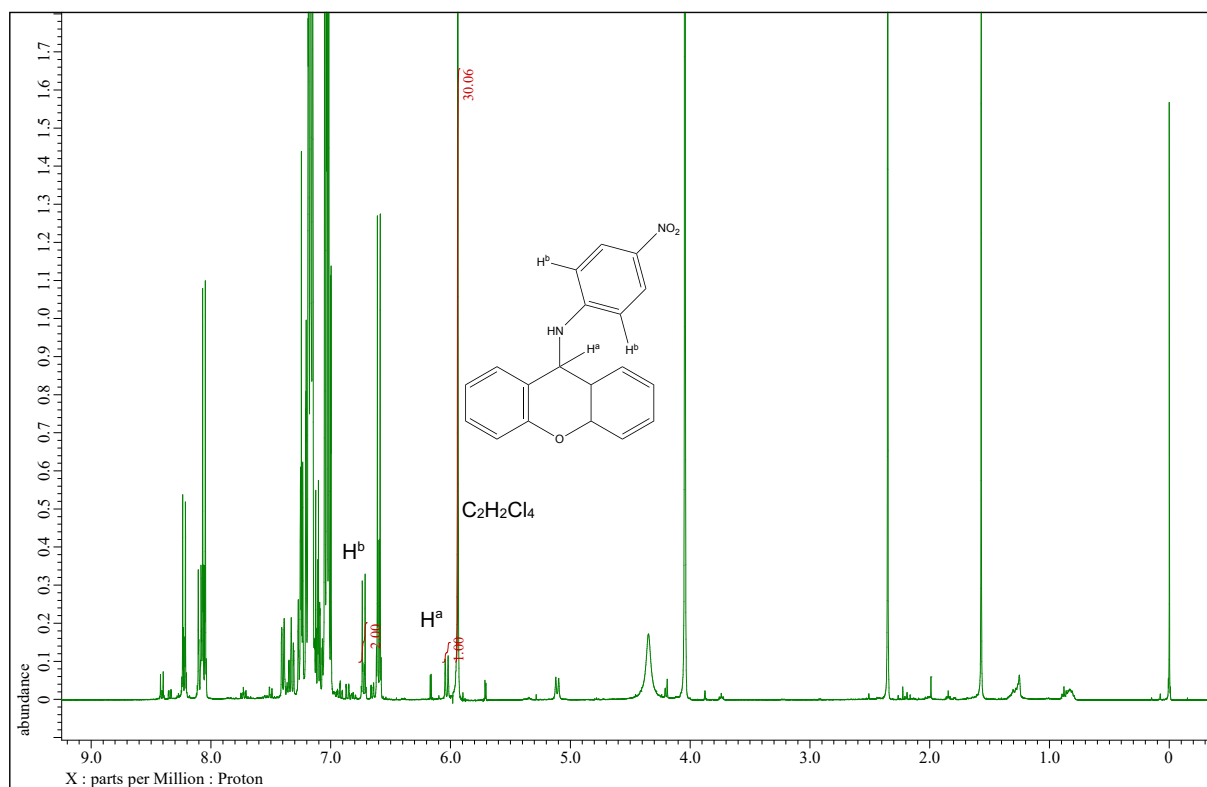

**Fig. S11**  $^1\text{H-NMR}$  spectrum of obtained solid by a reaction of xanthene and 4-nitrophenylazide in the presence of  $[\text{Rh}(\text{TAMM})]_2$  (5% mol) at 100 °C for 24 h. A peak around 6 ppm is due to the internal standard (1,1,2,2-tetrachloroethane).  $\text{H}^a$  and  $\text{H}^b$  were assigned by comparing chemical shifts of those reported in literature (Y. Liu and C.-M. Che, *Chem. Eur. J.*, 2010, **16**, 10494).

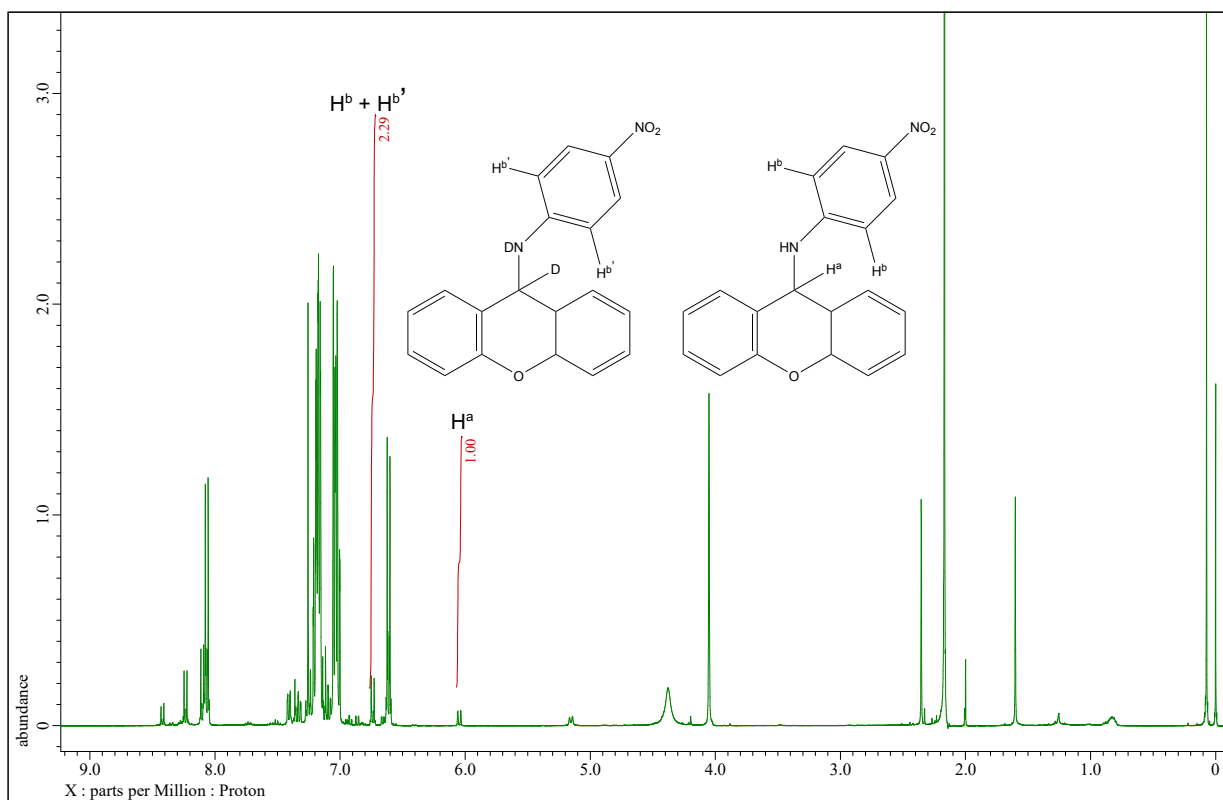

**Fig. S12**  $^1\text{H-NMR}$  spectrum of obtained solid by a reaction of xanthene, xanthene- $d_2$  (1 : 1), and 4-nitro-phenylazide in the presence of  $[\text{Rh}(\text{TAMM})_2]$  (5% mol) at 100 °C for 24 h.  $\text{H}_a$  and  $\text{H}_b$  were assigned by comparing chemical shifts of those reported in literature (Y. Liu and C.-M. Che, *Chem. Eur. J.*, 2010, **16**, 10494).

**Table S1. Crystallographic Data for [Rh<sup>III</sup>(TMAA)(CH<sub>3</sub>CN)]PF<sub>6</sub>•CH<sub>3</sub>CN (2<sup>CH<sub>3</sub>CN</sup>•CH<sub>3</sub>CN) and [Rh<sup>III</sup>(TMAA)(py)]PF<sub>6</sub> (2<sup>py</sup>)**

|                             | 2 <sup>CH<sub>3</sub>CN</sup> •CH <sub>3</sub> CN                 | 2 <sup>py</sup>                                                   |
|-----------------------------|-------------------------------------------------------------------|-------------------------------------------------------------------|
| formula                     | C <sub>26</sub> H <sub>28</sub> F <sub>6</sub> N <sub>6</sub> PRh | C <sub>27</sub> H <sub>27</sub> F <sub>6</sub> N <sub>5</sub> PRh |
| fw                          | 672.42                                                            | 669.41                                                            |
| cryst system                | Triclinic                                                         | Monoclinic                                                        |
| space group                 | <i>P</i> -1 (#2)                                                  | <i>C</i> 2/c (#15)                                                |
| <i>a</i> , Å                | 8.6913(8)                                                         | 13.4897(13)                                                       |
| <i>b</i> , Å                | 11.5969(12)                                                       | 20.8788(18)                                                       |
| <i>c</i> , Å                | 13.7677(14)                                                       | 18.4267(19)                                                       |
| $\alpha$ , deg              | 71.972(5)                                                         | 90                                                                |
| $\beta$ , deg               | 85.744(6)                                                         | 98.183(7)                                                         |
| $\gamma$ , deg              | 74.916(5)                                                         | 90                                                                |
| <i>V</i> , Å <sup>3</sup>   | 1274.1(2)                                                         | 5137.0(9)                                                         |
| <i>Z</i>                    | 2                                                                 | 8                                                                 |
| $\rho$ , g cm <sup>-3</sup> | 1.753                                                             | 1.731                                                             |
| $\Delta$ , cm <sup>-1</sup> | 8.07                                                              | 8.00                                                              |
| reflns. obsd                | 12505                                                             | 23608                                                             |
| parameters                  | 367                                                               | 365                                                               |
| <i>R</i> 1 <sup>a</sup>     | 0.0280                                                            | 0.0618                                                            |
| <i>wR</i> 2 <sup>b</sup>    | 0.0638                                                            | 0.1365                                                            |
| GOF                         | 1.039                                                             | 1.112                                                             |

<sup>a</sup>  $R1 = \Sigma(|F_o| - |F_c|) / \Sigma|F_o|$ . <sup>b</sup>  $wR2 = (\Sigma(w(F_o^2 - F_c^2)^2) / \Sigma w(F_o^2)^2)^{1/2}$ .

**Table S2. Optimized structure of 1.**

| Atom | X         | Y         | Z         |
|------|-----------|-----------|-----------|
| Rh   | -0.000006 | 0.000011  | 0.018567  |
| N    | -1.492378 | 1.330589  | -0.079702 |
| N    | 1.492339  | -1.330584 | -0.079611 |
| N    | -1.492341 | -1.330643 | -0.079578 |
| C    | 2.737562  | -0.717155 | 0.233011  |
| C    | -2.737617 | 0.717138  | 0.232899  |
| C    | 1.293591  | -2.591364 | -0.497948 |
| C    | -1.293543 | -2.591463 | -0.497748 |
| C    | 0.000042  | -3.133966 | -0.695763 |
| H    | 0.000062  | -4.151748 | -1.070782 |
| C    | -2.737574 | -0.717182 | 0.233021  |
| C    | 3.884248  | -1.393325 | 0.678062  |
| H    | 3.878627  | -2.471069 | 0.766649  |
| C    | 2.437708  | -3.520294 | -0.880040 |
| H    | 3.271962  | -2.971347 | -1.324414 |
| H    | 2.078012  | -4.251020 | -1.608666 |
| H    | 2.817238  | -4.081060 | -0.016984 |
| C    | -5.032905 | -0.697384 | 1.086458  |
| H    | -5.900989 | -1.253132 | 1.433888  |
| C    | -3.884314 | -1.393283 | 0.678037  |
| H    | -3.878764 | -2.471013 | 0.766676  |
| N    | 1.492380  | 1.330609  | -0.079666 |
| C    | -1.293567 | 2.591460  | -0.497760 |
| C    | 2.737622  | 0.717152  | 0.232961  |
| C    | -3.884485 | 1.393207  | 0.677645  |
| C    | -2.437596 | -3.520655 | -0.879384 |
| C    | 5.032821  | -0.697462 | 1.086587  |
| C    | -5.032994 | 0.697263  | 1.086232  |
| C    | 1.293597  | 2.591456  | -0.497729 |
| C    | -2.437593 | 3.520647  | -0.879545 |
| C    | 0.000010  | 3.134019  | -0.695561 |
| C    | 3.884459  | 1.393187  | 0.677834  |



|   |           |           |           |
|---|-----------|-----------|-----------|
| H | -3.879122 | 2.470952  | 0.766023  |
| H | -2.817154 | -4.080928 | -0.016024 |
| H | -3.271850 | -2.971994 | -1.324126 |
| H | -2.077846 | -4.251795 | -1.607560 |
| H | 5.900882  | -1.253231 | 1.434043  |
| C | 5.032927  | 0.697191  | 1.086450  |
| H | -5.901166 | 1.253008  | 1.433453  |
| C | 2.437624  | 3.520637  | -0.879527 |
| H | -3.271778 | 2.972006  | -1.324430 |
| H | -2.817284 | 4.080938  | -0.016233 |
| H | -2.077720 | 4.251803  | -1.607652 |
| H | 0.000020  | 4.151874  | -1.070412 |
| H | 3.879095  | 2.470934  | 0.766284  |
| H | 5.901093  | 1.252887  | 1.433761  |
| H | 2.077787  | 4.251681  | -1.607770 |
| H | 2.817186  | 4.081058  | -0.016238 |
| H | 3.271876  | 2.971985  | -1.324255 |

**Table S3. Optimized structure of 2<sup>N•Ns</sup>.**

| Atom | X         | Y         | Z         |
|------|-----------|-----------|-----------|
| C    | -3.538926 | -1.225787 | -0.584170 |
| C    | -2.890436 | -0.001857 | -0.791032 |
| C    | -3.539822 | 1.221711  | -0.584805 |
| C    | -4.869163 | 1.225320  | -0.151952 |
| C    | -5.507973 | -0.002590 | 0.060690  |
| C    | -4.868267 | -1.230141 | -0.151309 |
| N    | -0.405995 | -0.000323 | 0.141879  |
| Rh   | 1.525787  | 0.000863  | 0.221547  |
| N    | 1.896441  | 1.519146  | -1.052779 |
| C    | 2.449050  | 1.297148  | -2.253807 |
| C    | 2.917140  | 2.434397  | -3.146137 |
| N    | 1.898622  | -1.516896 | -1.052800 |
| C    | 2.450927  | -1.294099 | -2.253811 |
| C    | 2.712289  | 0.001721  | -2.758382 |

|   |          |           |           |
|---|----------|-----------|-----------|
| N | 1.603538 | 1.522186  | 1.561859  |
| C | 1.885714 | 1.298261  | 2.851902  |
| C | 2.172314 | 2.434339  | 3.822572  |
| N | 1.605954 | -1.520310 | 1.561864  |
| C | 1.346791 | -2.756177 | 0.929564  |
| C | 1.500554 | -2.752656 | -0.495647 |
| C | 1.128753 | -3.896977 | -1.223389 |
| C | 0.662458 | -5.044787 | -0.575133 |
| C | 0.519370 | -5.052308 | 0.817480  |
| C | 0.840431 | -3.909618 | 1.557532  |
| C | 1.342403 | 2.757605  | 0.929490  |
| C | 0.834047 | 3.910237  | 1.557337  |
| C | 0.511168 | 5.052360  | 0.817201  |
| C | 0.654412 | 5.045013  | -0.575394 |
| C | 1.122673 | 3.897945  | -1.223548 |
| C | 1.496312 | 2.754275  | -0.495716 |
| C | 1.887819 | -1.295926 | 2.851895  |
| C | 2.176290 | -2.431579 | 3.822512  |
| C | 2.024075 | 0.001274  | 3.403786  |
| C | 2.920705 | -2.430667 | -3.146122 |
| H | 2.291413 | 0.001486  | 4.454559  |
| H | 0.631614 | 3.907838  | 2.619782  |
| H | 2.661622 | 3.275572  | 3.325420  |
| H | 2.826514 | 2.072261  | 4.619326  |
| H | 1.253487 | 2.801887  | 4.295186  |
| H | 0.119661 | -5.926077 | 1.327230  |
| H | 0.638148 | -3.907509 | 2.620011  |
| H | 1.133064 | -3.876848 | -2.304114 |
| H | 1.258098 | -2.800526 | 4.295271  |
| H | 2.666779 | -3.272067 | 3.325264  |
| H | 2.830075 | -2.068524 | 4.619162  |
| H | 0.109944 | 5.925483  | 1.326868  |
| H | 0.370691 | -5.911070 | -1.164490 |
| H | 3.280587 | -3.282441 | -2.563804 |

|   |           |           |           |
|---|-----------|-----------|-----------|
| H | 2.112341  | -2.775984 | -3.801583 |
| H | 3.733144  | -2.076464 | -3.785257 |
| H | 3.191491  | 0.002072  | -3.730781 |
| H | 1.127121  | 3.877775  | -2.304271 |
| H | 0.361265  | 5.910781  | -1.164824 |
| H | 3.730107  | 2.081381  | -3.785261 |
| H | 2.108264  | 2.778486  | -3.801613 |
| H | 3.275763  | 3.286718  | -2.563846 |
| H | -5.409478 | -2.154513 | 0.019889  |
| H | -5.411052 | 2.149386  | 0.018755  |
| S | -1.166899 | -0.001385 | -1.366766 |
| O | -0.960839 | 1.275655  | -2.094564 |
| O | -0.959734 | -1.278936 | -2.093350 |
| H | -3.011522 | 2.151722  | -0.775288 |
| H | -3.009933 | -2.155501 | -0.774180 |
| N | -6.912449 | -0.002981 | 0.521070  |
| O | -7.459422 | 1.091705  | 0.700732  |
| O | -7.458584 | -1.097971 | 0.701425  |

**Table S4. Optimized structure of 1<sup>N3Trs</sup>.**

| Atom | X         | Y         | Z         |
|------|-----------|-----------|-----------|
| C    | -1.741654 | -2.867288 | -0.854508 |
| C    | -1.878702 | -2.984266 | 0.574930  |
| C    | -1.385578 | -4.139610 | 1.209463  |
| C    | -0.798362 | -5.183338 | 0.481137  |
| C    | -0.659900 | -5.067706 | -0.905063 |
| C    | -1.111914 | -3.912279 | -1.556749 |
| N    | -2.401965 | -1.847986 | 1.231355  |
| C    | -2.982610 | -1.785677 | 2.436464  |
| C    | -3.411026 | -0.568427 | 3.029603  |
| C    | -3.350119 | 0.786419  | 2.606886  |
| C    | -3.998442 | 1.776643  | 3.565286  |
| N    | -2.157759 | -1.638093 | -1.408612 |
| C    | -2.485951 | -1.374438 | -2.680070 |

|    |           |           |           |
|----|-----------|-----------|-----------|
| C  | -2.819709 | -0.075374 | -3.141835 |
| C  | -2.857344 | 1.194406  | -2.508841 |
| C  | -3.308864 | 2.334973  | -3.410466 |
| Rh | -2.354002 | -0.219139 | 0.022364  |
| N  | -2.832300 | 1.162657  | 1.430726  |
| C  | -2.661012 | 2.477010  | 0.935007  |
| C  | -2.524449 | 2.588174  | -0.493314 |
| C  | -2.218102 | 3.846469  | -1.043933 |
| C  | -2.084233 | 4.985376  | -0.240062 |
| C  | -2.219583 | 4.877781  | 1.147297  |
| C  | -2.486826 | 3.629421  | 1.723984  |
| N  | -2.588027 | 1.372158  | -1.209605 |
| N  | 0.176856  | 0.171793  | 0.346132  |
| S  | 1.253013  | 0.620473  | -1.042181 |
| O  | 0.933300  | 2.011683  | -1.388737 |
| C  | -2.608446 | -2.466850 | -3.733364 |
| C  | -3.313151 | -3.032079 | 3.247463  |
| C  | 2.928750  | 0.448369  | -0.345259 |
| C  | 3.763067  | 1.586943  | -0.154243 |
| C  | 5.094435  | 1.331505  | 0.216328  |
| C  | 5.601363  | 0.046206  | 0.424100  |
| C  | 4.721888  | -1.034893 | 0.290212  |
| C  | 3.381101  | -0.878087 | -0.082132 |
| C  | 3.363995  | 3.057976  | -0.333958 |
| C  | 3.759079  | 3.549564  | -1.744377 |
| C  | 2.528577  | -2.151219 | -0.153286 |
| C  | 2.946380  | -3.021626 | -1.356786 |
| C  | 7.060570  | -0.159030 | 0.805048  |
| C  | 7.812144  | -0.992547 | -0.253936 |
| C  | 3.959669  | 3.977671  | 0.751795  |
| C  | 7.200488  | -0.786556 | 2.208006  |
| C  | 2.594230  | -2.950142 | 1.165968  |
| O  | 0.992659  | -0.437099 | -2.021767 |
| H  | -3.892042 | -0.700741 | 3.992790  |

|   |           |           |           |
|---|-----------|-----------|-----------|
| H | -1.410021 | -4.215151 | 2.288352  |
| H | -3.590520 | -3.869246 | 2.601389  |
| H | -4.151080 | -2.817185 | 3.915136  |
| H | -2.469775 | -3.349053 | 3.873546  |
| H | -2.081029 | 5.746128  | 1.787871  |
| H | -2.503182 | 3.553282  | 2.802997  |
| H | -2.016921 | 3.936888  | -2.102509 |
| H | -3.264285 | 2.229554  | 4.243051  |
| H | -4.506409 | 2.581474  | 3.027354  |
| H | -4.733162 | 1.254120  | 4.182788  |
| H | -0.425766 | -6.060775 | 1.005575  |
| H | -1.835120 | 5.939228  | -0.700194 |
| H | -3.920116 | 3.060769  | -2.867578 |
| H | -2.454431 | 2.865507  | -3.848411 |
| H | -3.900408 | 1.931165  | -4.235843 |
| H | -3.094300 | -0.044903 | -4.190649 |
| H | -0.918752 | -3.809780 | -2.615736 |
| H | -0.175394 | -5.853019 | -1.481702 |
| H | -3.296950 | -2.139202 | -4.516122 |
| H | -1.643527 | -2.674536 | -4.212160 |
| H | -2.987420 | -3.399437 | -3.306823 |
| H | 5.761516  | 2.178231  | 0.351010  |
| H | 5.084217  | -2.041143 | 0.482218  |
| H | 7.529464  | 0.833257  | 0.838995  |
| H | 1.482198  | -1.893555 | -0.301456 |
| H | 8.873157  | -1.077649 | 0.009550  |
| H | 7.404277  | -2.007890 | -0.325311 |
| H | 7.741382  | -0.532557 | -1.245933 |
| H | 8.258087  | -0.868735 | 2.485753  |
| H | 6.693222  | -0.180654 | 2.967135  |
| H | 6.768862  | -1.794089 | 2.239304  |
| H | 3.506197  | 4.971635  | 0.662650  |
| H | 3.750358  | 3.601991  | 1.759880  |
| H | 5.043254  | 4.109820  | 0.653521  |

|   |          |           |           |
|---|----------|-----------|-----------|
| H | 2.282703 | 3.144305  | -0.256434 |
| H | 3.459484 | 4.596114  | -1.875848 |
| H | 4.844012 | 3.484945  | -1.894652 |
| H | 3.266252 | 2.958952  | -2.522620 |
| H | 1.885680 | -3.783882 | 1.114746  |
| H | 3.590113 | -3.367397 | 1.355544  |
| H | 2.319598 | -2.326461 | 2.024791  |
| H | 2.313162 | -3.914758 | -1.402322 |
| H | 2.826306 | -2.470026 | -2.294330 |
| H | 3.991048 | -3.346672 | -1.275741 |
| N | 0.417428 | 0.857832  | 1.369094  |
| N | 0.558870 | 1.424109  | 2.354942  |

**Table S5. Optimized structure of TS(<sup>N</sup>Trs-N<sub>2</sub>).**

| Atom | X         | Y         | Z         |
|------|-----------|-----------|-----------|
| C    | 3.296826  | 0.846727  | 0.079252  |
| C    | 2.642308  | -0.403265 | 0.255777  |
| C    | 3.309422  | -1.632136 | 0.006814  |
| C    | 4.685289  | -1.566878 | -0.273602 |
| C    | 5.390731  | -0.364170 | -0.359618 |
| C    | 4.668162  | 0.825609  | -0.211545 |
| S    | 0.952563  | -0.398540 | 0.982891  |
| O    | 0.846384  | 0.732280  | 1.932492  |
| C    | 2.669719  | -3.025595 | -0.021640 |
| C    | 2.998173  | -3.772468 | -1.332052 |
| C    | 6.887382  | -0.359218 | -0.639269 |
| C    | 7.216317  | 0.313905  | -1.988416 |
| C    | 2.620837  | 2.220831  | 0.131712  |
| C    | 2.846974  | 2.996417  | -1.184132 |
| N    | -0.086288 | 0.036190  | -0.352034 |
| N    | 0.414354  | -0.866586 | -1.534901 |
| N    | -0.138360 | -1.009230 | -2.547365 |
| O    | 0.649988  | -1.737967 | 1.536401  |
| C    | 3.087659  | -3.850915 | 1.212661  |

|    |           |           |           |
|----|-----------|-----------|-----------|
| C  | 3.098776  | 3.033695  | 1.351402  |
| C  | 7.679914  | 0.293114  | 0.512685  |
| Rh | -2.090481 | 0.233242  | 0.014422  |
| N  | -2.355298 | -1.254262 | 1.353201  |
| C  | -2.342510 | -2.514658 | 0.717088  |
| C  | -2.574730 | -2.482889 | -0.696824 |
| C  | -2.456911 | -3.674705 | -1.436464 |
| C  | -2.158652 | -4.886788 | -0.806685 |
| C  | -1.931231 | -4.917488 | 0.575060  |
| C  | -2.002709 | -3.738327 | 1.322106  |
| N  | -2.773604 | -1.195728 | -1.241922 |
| C  | -3.381630 | -0.882158 | -2.395181 |
| C  | -4.129923 | -1.918420 | -3.219090 |
| C  | -3.449630 | 0.437154  | -2.902417 |
| C  | -2.944373 | 1.670105  | -2.426128 |
| C  | -3.308154 | 2.877162  | -3.278042 |
| N  | -2.271911 | 1.789051  | -1.272346 |
| C  | -1.694292 | 2.954103  | -0.728901 |
| C  | -1.498390 | 2.931151  | 0.693055  |
| C  | -0.825808 | 4.008199  | 1.301240  |
| C  | -0.392260 | 5.106755  | 0.552692  |
| C  | -0.585767 | 5.129700  | -0.834044 |
| C  | -1.212140 | 4.051562  | -1.466963 |
| N  | -1.911158 | 1.746295  | 1.335640  |
| C  | -2.169369 | 1.566839  | 2.640310  |
| C  | -2.244696 | 2.729104  | 3.617201  |
| C  | -2.471179 | 0.305970  | 3.202316  |
| C  | -2.544541 | -0.997442 | 2.654435  |
| C  | -2.944010 | -2.079992 | 3.643651  |
| H  | -3.999377 | 0.519206  | -3.833375 |
| H  | -1.272998 | 4.047620  | -2.547091 |
| H  | -3.508852 | 3.758986  | -2.664240 |
| H  | -4.202142 | 2.649921  | -3.863669 |
| H  | -2.508189 | 3.127384  | -3.985357 |

|   |           |           |           |
|---|-----------|-----------|-----------|
| H | -2.062204 | -5.791421 | -1.402940 |
| H | -2.536670 | -3.654262 | -2.515038 |
| H | -1.716761 | -3.766131 | 2.364014  |
| H | -3.466211 | -2.408722 | -3.941530 |
| H | -4.579869 | -2.689485 | -2.588894 |
| H | -4.923001 | -1.424669 | -3.786050 |
| H | -0.217279 | 5.961610  | -1.430160 |
| H | -1.651141 | -5.846209 | 1.067137  |
| H | -3.582493 | -2.837157 | 3.181629  |
| H | -2.060469 | -2.579577 | 4.058570  |
| H | -3.487607 | -1.627397 | 4.476503  |
| H | -2.677621 | 0.342068  | 4.266082  |
| H | -0.580005 | 3.969461  | 2.353009  |
| H | 0.130616  | 5.920401  | 1.050573  |
| H | -2.903698 | 2.461835  | 4.446834  |
| H | -1.258165 | 2.953650  | 4.040204  |
| H | -2.632441 | 3.634695  | 3.143911  |
| H | 5.223339  | -2.497603 | -0.438446 |
| H | 5.181891  | 1.776581  | -0.328870 |
| H | 7.207318  | -1.407641 | -0.707838 |
| H | 1.546154  | 2.090056  | 0.234521  |
| H | 8.758167  | 0.233927  | 0.319884  |
| H | 7.418546  | 1.352203  | 0.624943  |
| H | 7.473938  | -0.204574 | 1.466947  |
| H | 8.291358  | 0.251438  | -2.197387 |
| H | 6.677929  | -0.167056 | -2.812818 |
| H | 6.939287  | 1.374918  | -1.981734 |
| H | 2.434145  | -4.712676 | -1.364001 |
| H | 2.714569  | -3.178822 | -2.208360 |
| H | 4.061009  | -4.025399 | -1.422225 |
| H | 1.588795  | -2.921036 | 0.018463  |
| H | 2.616703  | -4.841349 | 1.182498  |
| H | 4.174749  | -3.995852 | 1.250761  |
| H | 2.771328  | -3.351891 | 2.133619  |



|   |          |          |           |
|---|----------|----------|-----------|
| H | 2.270666 | 3.928465 | -1.160248 |
| H | 3.900043 | 3.257965 | -1.341881 |
| H | 2.510243 | 2.412755 | -2.048679 |
| H | 2.595354 | 4.007852 | 1.372920  |
| H | 2.862430 | 2.504327 | 2.279407  |
| H | 4.180613 | 3.214212 | 1.319430  |

**Table S6. Optimized structure of 2<sup>NTrs</sup>.**

| Atom | X         | Y         | Z         |
|------|-----------|-----------|-----------|
| C    | 2.317079  | 2.824400  | -0.138529 |
| C    | 3.080177  | 1.494868  | -0.143206 |
| C    | 2.515982  | 0.216562  | -0.392766 |
| C    | 3.257838  | -0.974246 | -0.158902 |
| C    | 4.617598  | -0.840134 | 0.157985  |
| C    | 5.243807  | 0.404860  | 0.294214  |
| C    | 4.448604  | 1.547305  | 0.172737  |
| N    | -0.100038 | 0.022169  | 0.283593  |
| Rh   | -2.025609 | -0.117024 | 0.147115  |
| N    | -2.153160 | -1.639296 | -1.169911 |
| C    | -2.594851 | -1.438865 | -2.419324 |
| C    | -2.888423 | -2.591880 | -3.364724 |
| N    | -2.374170 | 1.389299  | -1.148078 |
| C    | -2.783472 | 1.144862  | -2.400635 |
| C    | -2.897416 | -0.158386 | -2.939011 |
| N    | -2.134272 | -1.661346 | 1.462096  |
| C    | -2.568023 | -1.475881 | 2.715162  |
| C    | -2.878267 | -2.642242 | 3.642247  |
| N    | -2.355341 | 1.376214  | 1.483871  |
| C    | -2.133113 | 2.638068  | 0.890235  |
| C    | -2.136640 | 2.643461  | -0.543537 |
| C    | -1.787550 | 3.825971  | -1.219678 |
| C    | -1.490484 | 4.999239  | -0.518634 |
| C    | -1.495856 | 4.997579  | 0.880934  |
| C    | -1.794461 | 3.820074  | 1.574985  |

|   |           |           |           |
|---|-----------|-----------|-----------|
| C | -1.732387 | -2.869145 | 0.850735  |
| C | -1.226420 | -3.999833 | 1.518837  |
| C | -0.761254 | -5.111654 | 0.808290  |
| C | -0.756329 | -5.092186 | -0.591136 |
| C | -1.220250 | -3.964127 | -1.275615 |
| C | -1.736101 | -2.854339 | -0.583002 |
| C | -2.756683 | 1.112146  | 2.733584  |
| C | -3.232016 | 2.207968  | 3.676685  |
| C | -2.855061 | -0.199728 | 3.258850  |
| C | -3.242386 | 2.256565  | -3.329623 |
| H | -3.231810 | -0.234443 | 4.274946  |
| H | -1.136909 | -4.000863 | 2.596626  |
| H | -3.259682 | -3.505004 | 3.090370  |
| H | -3.631951 | -2.334112 | 4.370894  |
| H | -1.990585 | -2.958889 | 4.203078  |
| H | -1.228764 | 5.893918  | 1.436357  |
| H | -1.704069 | 3.818242  | 2.652695  |
| H | -1.676345 | 3.822060  | -2.294767 |
| H | -2.399285 | 2.641404  | 4.243656  |
| H | -3.734315 | 3.014459  | 3.136622  |
| H | -3.933040 | 1.783586  | 4.399449  |
| H | -0.367377 | -5.968058 | 1.351149  |
| H | -1.213784 | 5.895710  | -1.068952 |
| H | -3.727297 | 3.069339  | -2.783244 |
| H | -2.397757 | 2.672528  | -3.891715 |
| H | -3.952243 | 1.851568  | -4.054954 |
| H | -3.272575 | -0.178432 | -3.955875 |
| H | -1.111650 | -3.928661 | -2.350406 |
| H | -0.353400 | -5.931236 | -1.153915 |
| H | -3.650130 | -2.283826 | -4.085091 |
| H | -1.992849 | -2.872804 | -3.931659 |
| H | -3.249774 | -3.474146 | -2.830596 |
| H | 4.906459  | 2.520685  | 0.335831  |
| C | 6.730686  | 0.521398  | 0.601271  |

|   |          |           |           |
|---|----------|-----------|-----------|
| H | 5.200022 | -1.745645 | 0.310328  |
| C | 2.686477 | -2.397062 | -0.173577 |
| S | 0.836110 | 0.101713  | -1.135254 |
| O | 0.746313 | -1.156179 | -1.921638 |
| O | 0.565140 | 1.346866  | -1.900007 |
| C | 7.088494 | -0.107790 | 1.964131  |
| C | 7.593462 | -0.078854 | -0.528420 |
| H | 6.965509 | 1.592685  | 0.661721  |
| C | 2.977457 | -3.128319 | 1.154683  |
| H | 1.604602 | -2.347464 | -0.272170 |
| C | 3.210055 | -3.200342 | -1.381079 |
| H | 8.660234 | 0.067079  | -0.318084 |
| H | 7.417679 | -1.156319 | -0.632118 |
| H | 7.365954 | 0.390477  | -1.492109 |
| H | 8.151419 | 0.042149  | 2.190411  |
| H | 6.499029 | 0.338288  | 2.773146  |
| H | 6.896553 | -1.187470 | 1.966599  |
| C | 2.506910 | 3.569805  | 1.200187  |
| H | 1.862908 | 4.457458  | 1.215645  |
| H | 2.227809 | 2.934020  | 2.048450  |
| H | 3.539236 | 3.905674  | 1.353746  |
| C | 2.722896 | 3.709114  | -1.334405 |
| H | 1.252413 | 2.626135  | -0.238045 |
| H | 2.159836 | 4.650600  | -1.315723 |
| H | 3.792075 | 3.955067  | -1.309796 |
| H | 2.504472 | 3.199187  | -2.277364 |
| H | 2.460691 | -4.095706 | 1.157231  |
| H | 4.046106 | -3.322694 | 1.304531  |
| H | 2.615330 | -2.548399 | 2.011539  |
| H | 2.782887 | -4.210934 | -1.376317 |
| H | 2.922700 | -2.712511 | -2.317201 |
| H | 4.303042 | -3.296215 | -1.358557 |

**Table S7. Optimized structure of TS1.**

| Atom | X         | Y         | Z         |
|------|-----------|-----------|-----------|
| C    | 3.749224  | -0.023612 | 1.015287  |
| C    | 2.571720  | -0.358607 | 0.299158  |
| C    | 2.624963  | -0.813956 | -1.037617 |
| C    | 3.874584  | -0.879888 | -1.675543 |
| C    | 5.057159  | -0.533031 | -1.014690 |
| C    | 4.967305  | -0.119980 | 0.322636  |
| S    | 0.911997  | -0.287335 | 1.091235  |
| O    | 0.636631  | -1.655261 | 1.611960  |
| C    | 1.394762  | -1.276440 | -1.781918 |
| C    | 1.241167  | -0.749529 | -3.201156 |
| C    | 6.398413  | -0.613728 | -1.732321 |
| C    | 7.344954  | -1.635416 | -1.068091 |
| C    | 3.759370  | 0.350737  | 2.499969  |
| C    | 3.704322  | -0.934543 | 3.360499  |
| N    | -0.007145 | 0.181651  | -0.243895 |
| O    | 0.836787  | 0.817839  | 2.081650  |
| C    | 1.097621  | -2.760757 | -1.608869 |
| C    | 7.070073  | 0.770973  | -1.844666 |
| C    | 4.952697  | 1.227251  | 2.919513  |
| Rh   | -2.000653 | 0.311310  | -0.054189 |
| N    | -1.999204 | 1.687244  | -1.545135 |
| C    | -1.394961 | 2.885301  | -1.108298 |
| C    | -1.309274 | 3.038573  | 0.315327  |
| C    | -0.597041 | 4.133628  | 0.837731  |
| C    | -0.020226 | 5.090027  | -0.003889 |
| C    | -0.112644 | 4.946223  | -1.393161 |
| C    | -0.777890 | 3.841744  | -1.935622 |
| N    | -1.852692 | 1.977465  | 1.068370  |
| C    | -2.207286 | 1.982509  | 2.360157  |
| C    | -2.288595 | 3.266589  | 3.169677  |
| C    | -2.613912 | 0.819587  | 3.054229  |

|   |           |           |           |
|---|-----------|-----------|-----------|
| C | -2.693888 | -0.541331 | 2.676373  |
| C | -3.228118 | -1.466220 | 3.758821  |
| N | -2.400084 | -0.979560 | 1.442234  |
| C | -2.401300 | -2.315658 | 0.984677  |
| C | -2.179728 | -3.453563 | 1.780922  |
| C | -2.135686 | -4.733278 | 1.220676  |
| C | -2.274510 | -4.894893 | -0.162694 |
| C | -2.443858 | -3.772905 | -0.979921 |
| C | -2.521597 | -2.477370 | -0.433952 |
| N | -2.584175 | -1.273736 | -1.173720 |
| C | -3.061361 | -1.100592 | -2.417504 |
| C | -3.787292 | -2.209846 | -3.166893 |
| C | -3.013903 | 0.136106  | -3.104667 |
| C | -2.527486 | 1.419631  | -2.742892 |
| C | -2.744239 | 2.499690  | -3.793166 |
| H | -2.905765 | 1.005040  | 4.081839  |
| H | -1.965690 | -3.342049 | 2.834402  |
| H | -3.859969 | -2.255452 | 3.343730  |
| H | -3.819300 | -0.885070 | 4.470648  |
| H | -2.410382 | -1.937681 | 4.316833  |
| H | 0.535939  | 5.918381  | 0.429373  |
| H | -0.429973 | 4.212395  | 1.902850  |
| H | -0.760481 | 3.703484  | -3.008415 |
| H | -1.329529 | 3.489612  | 3.652421  |
| H | -2.571050 | 4.121735  | 2.550635  |
| H | -3.033433 | 3.147820  | 3.960638  |
| H | -1.948138 | -5.592183 | 1.861070  |
| H | 0.366004  | 5.663355  | -2.056392 |
| H | -2.966143 | 3.466851  | -3.335159 |
| H | -1.865285 | 2.620388  | -4.438077 |
| H | -3.582879 | 2.217411  | -4.434541 |
| H | -3.460668 | 0.103119  | -4.092258 |
| H | -2.460047 | -3.915154 | -2.051960 |
| H | -2.206896 | -5.882137 | -0.614381 |

|   |           |           |           |
|---|-----------|-----------|-----------|
| H | -4.471606 | -1.765989 | -3.893770 |
| H | -3.092738 | -2.852637 | -3.721298 |
| H | -4.364921 | -2.841104 | -2.486854 |
| H | 3.922027  | -1.219239 | -2.708524 |
| H | 5.878905  | 0.140813  | 0.851771  |
| H | 6.198181  | -0.966280 | -2.753258 |
| H | 2.850529  | 0.917250  | 2.706088  |
| H | 8.279322  | -1.721075 | -1.636441 |
| H | 7.603212  | -1.332413 | -0.046348 |
| H | 6.882958  | -2.627724 | -1.015380 |
| H | 8.003998  | 0.701130  | -2.415952 |
| H | 6.413128  | 1.490150  | -2.346767 |
| H | 7.313540  | 1.175522  | -0.854976 |
| H | 0.149516  | -3.029174 | -2.087108 |
| H | 1.893572  | -3.361797 | -2.076332 |
| H | 1.040390  | -3.035933 | -0.551512 |
| H | 4.803338  | 1.568478  | 3.950638  |
| H | 5.904870  | 0.682393  | 2.898972  |
| H | 5.050166  | 2.114535  | 2.282871  |
| H | 3.672974  | -0.673260 | 4.425578  |
| H | 2.816044  | -1.531379 | 3.130900  |
| H | 4.591990  | -1.557182 | 3.188733  |
| H | 0.451502  | -0.600523 | -1.114552 |
| H | 0.233016  | -0.958094 | -3.579036 |
| H | 1.410056  | 0.331790  | -3.244778 |
| H | 1.951658  | -1.232353 | -3.889790 |

**Table S8. Optimized structure of Int.**

| <b>Atom</b> | <b>X</b>  | <b>Y</b>  | <b>Z</b>  |
|-------------|-----------|-----------|-----------|
| C           | -3.305042 | -0.676049 | 0.894489  |
| C           | -2.616915 | -0.250790 | -0.267997 |
| C           | -3.307417 | 0.429559  | -1.335993 |
| C           | -4.732280 | 0.434217  | -1.261903 |
| C           | -5.436422 | -0.042308 | -0.161274 |

|    |           |           |           |
|----|-----------|-----------|-----------|
| C  | -4.702865 | -0.544395 | 0.927883  |
| S  | -0.923100 | -0.889625 | -0.565283 |
| O  | -0.857805 | -2.241462 | 0.048897  |
| C  | -2.703082 | 1.166191  | -2.417031 |
| C  | -3.459927 | 1.401176  | -3.701031 |
| C  | -6.957984 | 0.020641  | -0.129576 |
| C  | -7.583204 | -1.386132 | -0.024233 |
| C  | -2.635788 | -1.244726 | 2.151956  |
| C  | -3.059490 | -2.702464 | 2.418554  |
| N  | 0.039736  | 0.241065  | 0.240596  |
| Rh | 2.078927  | 0.179810  | 0.098978  |
| N  | 2.425202  | -0.949066 | -1.534469 |
| C  | 2.291218  | -2.328729 | -1.251296 |
| C  | 2.316482  | -2.672162 | 0.138186  |
| C  | 2.073138  | -4.004418 | 0.515454  |
| C  | 1.841157  | -4.995911 | -0.441630 |
| C  | 1.804399  | -4.658665 | -1.798898 |
| C  | 2.006667  | -3.333358 | -2.193481 |
| N  | 2.455324  | -1.578936 | 1.026355  |
| C  | 2.880777  | -1.612518 | 2.295513  |
| C  | 3.440625  | -2.876553 | 2.932445  |
| C  | 2.932605  | -0.465595 | 3.131889  |
| C  | 2.598670  | 0.891929  | 2.919426  |
| C  | 2.890198  | 1.812629  | 4.096254  |
| N  | 2.141891  | 1.357602  | 1.746799  |
| C  | 1.669909  | 2.653622  | 1.453070  |
| C  | 1.643340  | 2.992683  | 0.057749  |
| C  | 1.071939  | 4.220774  | -0.327940 |
| C  | 0.570584  | 5.119335  | 0.618882  |
| C  | 0.596780  | 4.788136  | 1.978691  |
| C  | 1.124483  | 3.558126  | 2.384455  |
| N  | 2.094255  | 1.983312  | -0.815663 |
| C  | 2.486229  | 2.113862  | -2.091456 |
| C  | 2.720332  | 3.474462  | -2.732567 |

|   |           |           |           |
|---|-----------|-----------|-----------|
| C | 2.803927  | 1.010559  | -2.915755 |
| C | 2.778481  | -0.390365 | -2.699855 |
| C | 3.277129  | -1.213491 | -3.877910 |
| O | -0.622598 | -0.803622 | -2.009921 |
| C | -1.417331 | 1.932538  | -2.296646 |
| C | -2.913589 | -0.340149 | 3.372601  |
| C | -7.473716 | 0.940567  | 0.996733  |
| H | 3.326737  | -0.667430 | 4.121759  |
| H | 1.059531  | 3.287969  | 3.429913  |
| H | 3.229910  | 2.796351  | 3.762282  |
| H | 3.671924  | 1.367226  | 4.716498  |
| H | 2.008499  | 1.953267  | 4.733279  |
| H | 1.637888  | -6.014759 | -0.119512 |
| H | 1.989076  | -4.268307 | 1.560543  |
| H | 1.866719  | -3.078314 | -3.234166 |
| H | 2.649069  | -3.489474 | 3.380114  |
| H | 3.975158  | -3.490951 | 2.203796  |
| H | 4.133423  | -2.601630 | 3.731473  |
| H | 0.174003  | 5.461902  | 2.720604  |
| H | 1.568641  | -5.410373 | -2.548819 |
| H | 3.832866  | -2.095448 | -3.550292 |
| H | 2.446001  | -1.546063 | -4.511173 |
| H | 3.935029  | -0.597662 | -4.496067 |
| H | 3.143679  | 1.290889  | -3.906683 |
| H | 0.960505  | 4.461717  | -1.376138 |
| H | 0.124984  | 6.054365  | 0.286699  |
| H | 3.461382  | 3.374558  | -3.529452 |
| H | 1.804271  | 3.871655  | -3.186452 |
| H | 3.087544  | 4.204898  | -2.007073 |
| H | -5.288384 | 0.897452  | -2.072085 |
| H | -5.232263 | -0.870463 | 1.819746  |
| H | -7.283524 | 0.455240  | -1.084342 |
| H | -1.555729 | -1.270468 | 2.007681  |
| H | -8.567579 | 1.016282  | 0.961895  |



|   |           |           |           |
|---|-----------|-----------|-----------|
| H | -7.198718 | 0.552768  | 1.984998  |
| H | -7.056595 | 1.949910  | 0.905870  |
| H | -8.677841 | -1.325748 | -0.065750 |
| H | -7.243306 | -2.031975 | -0.841544 |
| H | -7.311314 | -1.872455 | 0.920342  |
| H | -2.748920 | 1.503258  | -4.530284 |
| H | -4.147370 | 0.585523  | -3.945509 |
| H | -4.041310 | 2.338017  | -3.672398 |
| H | -0.658566 | 1.547298  | -2.990682 |
| H | -1.610188 | 2.983729  | -2.567279 |
| H | -2.552562 | -3.086635 | 3.312771  |
| H | -4.140140 | -2.787742 | 2.584572  |
| H | -2.784219 | -3.334428 | 1.569408  |
| H | -2.364469 | -0.713273 | 4.246297  |
| H | -2.596314 | 0.692499  | 3.183578  |
| H | -3.977369 | -0.318150 | 3.635655  |
| H | -0.175212 | 0.114480  | 1.235321  |
| H | -0.992772 | 1.902523  | -1.292535 |

**Table S9. Optimized structure of TS2.**

| Atom | X         | Y         | Z         |
|------|-----------|-----------|-----------|
| C    | -3.482063 | -1.561635 | 0.228938  |
| C    | -2.356542 | -1.089625 | -0.478395 |
| C    | -2.477255 | -0.253289 | -1.604928 |
| C    | -3.756667 | 0.221623  | -1.947982 |
| C    | -4.896690 | -0.170311 | -1.234782 |
| C    | -4.737567 | -1.076563 | -0.174748 |
| C    | -1.312589 | 0.068299  | -2.459085 |
| N    | 0.267053  | -0.287301 | -0.686368 |
| S    | -0.670610 | -1.497353 | 0.085280  |
| Rh   | 1.882954  | 0.575590  | 0.360437  |
| N    | 3.100355  | 0.241683  | -1.228932 |
| C    | 3.483134  | -1.117539 | -1.294671 |
| C    | 3.273512  | -1.871405 | -0.088496 |

|   |           |           |           |
|---|-----------|-----------|-----------|
| C | 3.498712  | -3.260396 | -0.112793 |
| C | 3.959622  | -3.903076 | -1.266404 |
| C | 4.170273  | -3.168974 | -2.438817 |
| C | 3.914080  | -1.793326 | -2.453006 |
| N | 2.728193  | -1.144708 | 0.991691  |
| C | 2.785506  | -1.445621 | 2.298474  |
| C | 3.613952  | -2.608193 | 2.823476  |
| O | -0.318070 | -2.840748 | -0.449707 |
| O | -0.639167 | -1.294206 | 1.551296  |
| C | -1.070835 | 1.496601  | -2.855642 |
| C | -0.820095 | -1.006739 | -3.397555 |
| C | -6.270517 | 0.361038  | -1.623671 |
| C | -6.906584 | 1.183736  | -0.483667 |
| C | -3.406755 | -2.555571 | 1.388903  |
| C | -3.738855 | -1.866374 | 2.728198  |
| C | 2.157070  | -0.668393 | 3.299461  |
| C | 1.321615  | 0.473976  | 3.242873  |
| C | 0.869708  | 0.997156  | 4.597628  |
| N | 1.007294  | 1.094766  | 2.099614  |
| C | 0.105089  | 2.161575  | 1.913796  |
| C | -1.000668 | 2.453331  | 2.732740  |
| C | -1.892828 | 3.482885  | 2.409544  |
| C | -1.711050 | 4.221059  | 1.235447  |
| C | -0.639016 | 3.923843  | 0.384658  |
| C | 0.287656  | 2.914299  | 0.703847  |
| N | 1.338035  | 2.467563  | -0.125768 |
| C | 1.976868  | 3.146539  | -1.083947 |
| C | 1.771365  | 4.640581  | -1.293606 |
| C | 2.954495  | 2.559993  | -1.930923 |
| C | 3.484225  | 1.247758  | -2.026721 |
| C | 4.600033  | 1.087287  | -3.050361 |
| C | -7.215284 | -0.768158 | -2.085357 |
| C | -4.312638 | -3.779932 | 1.143486  |
| H | 2.333314  | -1.029562 | 4.306757  |

|   |           |           |           |
|---|-----------|-----------|-----------|
| H | -1.208612 | 1.839096  | 3.598405  |
| H | 0.787617  | 2.086976  | 4.606841  |
| H | 1.592049  | 0.696135  | 5.360637  |
| H | -0.102150 | 0.575484  | 4.882218  |
| H | 4.107278  | -4.980613 | -1.255520 |
| H | 3.250158  | -3.862980 | 0.749936  |
| H | 4.005848  | -1.260411 | -3.390087 |
| H | 3.040306  | -3.542993 | 2.814669  |
| H | 4.522547  | -2.758321 | 2.234411  |
| H | 3.900040  | -2.409844 | 3.859237  |
| H | -2.745882 | 3.674991  | 3.056616  |
| H | 4.491356  | -3.664556 | -3.352328 |
| H | 5.363882  | 0.386330  | -2.703805 |
| H | 4.222126  | 0.729579  | -4.016077 |
| H | 5.072528  | 2.057047  | -3.224912 |
| H | 3.403392  | 3.261126  | -2.626312 |
| H | -0.562232 | 4.454462  | -0.555345 |
| H | -2.417338 | 4.999992  | 0.956485  |
| H | 2.674102  | 5.072790  | -1.732486 |
| H | 0.942671  | 4.844521  | -1.983048 |
| H | 1.563324  | 5.153195  | -0.350953 |
| H | -3.861570 | 0.888004  | -2.802381 |
| H | -5.617643 | -1.413721 | 0.368391  |
| H | -6.125730 | 1.038043  | -2.476461 |
| H | -2.383931 | -2.927299 | 1.466714  |
| H | -7.865076 | 1.609970  | -0.804606 |
| H | -7.097370 | 0.559787  | 0.397717  |
| H | -6.250585 | 2.005514  | -0.175275 |
| H | -8.176199 | -0.355111 | -2.416015 |
| H | -6.780413 | -1.333782 | -2.917137 |
| H | -7.418873 | -1.474381 | -1.271557 |
| H | -0.019223 | 1.648046  | -3.127817 |
| H | -1.674128 | 1.773952  | -3.737857 |
| H | -1.321751 | 2.182723  | -2.041456 |

|   |           |           |           |
|---|-----------|-----------|-----------|
| H | -4.177226 | -4.508429 | 1.952016  |
| H | -5.375656 | -3.512121 | 1.117019  |
| H | -4.063343 | -4.273412 | 0.197433  |
| H | -3.655426 | -2.582912 | 3.554639  |
| H | -3.040665 | -1.044726 | 2.914974  |
| H | -4.760096 | -1.465051 | 2.730904  |
| H | 0.764191  | -0.821055 | -1.405606 |
| H | 0.199323  | -0.796952 | -3.747770 |
| H | -0.840021 | -2.001082 | -2.939910 |
| H | -1.461222 | -1.045488 | -4.295301 |

**Table S10. Optimized structure of PC.**

| Atom | X         | Y         | Z         |
|------|-----------|-----------|-----------|
| C    | -0.184361 | 2.893045  | 0.639837  |
| C    | -0.757321 | 1.962668  | 1.578069  |
| C    | -2.098189 | 2.143128  | 1.965987  |
| C    | -2.864432 | 3.213935  | 1.487250  |
| C    | -2.309949 | 4.113114  | 0.572645  |
| C    | -0.987239 | 3.937066  | 0.143808  |
| N    | 0.065397  | 0.873546  | 1.938661  |
| C    | -0.029060 | 0.091488  | 3.023994  |
| C    | 0.814955  | -1.024875 | 3.251478  |
| C    | 1.868517  | -1.612196 | 2.498467  |
| C    | 2.515738  | -2.820948 | 3.158999  |
| N    | 1.126583  | 2.590675  | 0.204854  |
| C    | 2.034053  | 3.428844  | -0.315844 |
| C    | 3.307742  | 3.004045  | -0.777951 |
| C    | 3.939760  | 1.732666  | -0.835619 |
| C    | 5.368598  | 1.759979  | -1.361756 |
| Rh   | 1.636794  | 0.683383  | 0.676156  |
| N    | 2.306006  | -1.107423 | 1.341229  |
| C    | 3.282349  | -1.643747 | 0.472046  |
| C    | 3.860347  | -0.714198 | -0.462800 |
| C    | 4.747987  | -1.198425 | -1.442805 |

|   |           |           |           |
|---|-----------|-----------|-----------|
| C | 5.102023  | -2.552489 | -1.502967 |
| C | 4.537115  | -3.455893 | -0.598072 |
| C | 3.625118  | -3.004178 | 0.363381  |
| N | 3.360632  | 0.609569  | -0.393221 |
| N | 0.513002  | -0.479072 | -1.610163 |
| S | -0.349672 | -1.964288 | -1.715523 |
| O | -0.390911 | -2.453642 | -3.113131 |
| C | 1.809945  | 4.934165  | -0.382749 |
| C | -1.006781 | 0.382217  | 4.154912  |
| C | -1.980141 | -1.329497 | -1.269538 |
| C | -2.312408 | -0.101580 | -1.894810 |
| C | -3.525557 | 0.497131  | -1.547518 |
| C | -4.413702 | -0.103675 | -0.639806 |
| C | -4.064971 | -1.340867 | -0.089496 |
| C | -2.850712 | -1.990216 | -0.382155 |
| C | -1.408319 | 0.464999  | -2.987288 |
| C | 0.078692  | 0.576056  | -2.562827 |
| C | -2.589288 | -3.361453 | 0.244728  |
| C | -2.404031 | -3.245329 | 1.772224  |
| C | -5.747364 | 0.564101  | -0.328226 |
| C | -6.044084 | 0.638967  | 1.181744  |
| C | -1.853102 | 1.816520  | -3.561272 |
| C | -6.901033 | -0.135897 | -1.080599 |
| C | -3.709505 | -4.361815 | -0.111529 |
| O | 0.248992  | -2.835505 | -0.686653 |
| H | 0.620084  | -1.531628 | 4.190525  |
| H | -2.576535 | 1.414413  | 2.606143  |
| H | -1.137293 | 1.456900  | 4.307753  |
| H | -0.628388 | -0.055451 | 5.081778  |
| H | -1.993171 | -0.058589 | 3.964065  |
| H | 4.763345  | -4.517836 | -0.662858 |
| H | 3.128063  | -3.736369 | 0.984010  |
| H | 5.133473  | -0.529852 | -2.201311 |
| H | 2.078157  | -3.759077 | 2.796190  |

|   |           |           |           |
|---|-----------|-----------|-----------|
| H | 3.593042  | -2.852882 | 2.976268  |
| H | 2.348322  | -2.777571 | 4.238065  |
| H | -3.899148 | 3.318022  | 1.807659  |
| H | 5.781046  | -2.896180 | -2.280117 |
| H | 6.000638  | 1.034227  | -0.843349 |
| H | 5.414573  | 1.545305  | -2.436729 |
| H | 5.789897  | 2.757009  | -1.211340 |
| H | 3.930267  | 3.814514  | -1.141696 |
| H | -0.599413 | 4.602071  | -0.616659 |
| H | -2.902013 | 4.931240  | 0.168071  |
| H | 2.776688  | 5.443417  | -0.384938 |
| H | 1.282758  | 5.231432  | -1.297924 |
| H | 1.231743  | 5.291740  | 0.473358  |
| H | -3.796310 | 1.450886  | -1.990910 |
| H | -4.756314 | -1.832523 | 0.590308  |
| H | -5.686294 | 1.594199  | -0.703769 |
| H | -1.658835 | -3.761234 | -0.156775 |
| H | -6.965507 | 1.205859  | 1.361268  |
| H | -6.183869 | -0.358259 | 1.615727  |
| H | -5.227403 | 1.131076  | 1.720951  |
| H | -7.849802 | 0.385902  | -0.904667 |
| H | -6.716435 | -0.156830 | -2.160506 |
| H | -7.018171 | -1.172384 | -0.741584 |
| H | -1.143274 | 2.142604  | -4.330812 |
| H | -2.838551 | 1.749579  | -4.034111 |
| H | -1.890138 | 2.590704  | -2.785909 |
| H | -1.443540 | -0.272173 | -3.799890 |
| H | 0.693068  | 0.553652  | -3.471366 |
| H | 0.247856  | 1.529884  | -2.054586 |
| H | -3.456259 | -5.355061 | 0.278141  |
| H | -4.675467 | -4.074579 | 0.320714  |
| H | -3.837040 | -4.446500 | -1.196701 |
| H | -2.205424 | -4.234213 | 2.203354  |
| H | -1.558541 | -2.593013 | 2.015244  |

|   |           |           |           |
|---|-----------|-----------|-----------|
| H | -3.302758 | -2.843794 | 2.257430  |
| H | 1.497567  | -0.721289 | -1.742039 |

**Table S11. Optimized structure of trisylazide.**

| Atom | X         | Y         | Z         |
|------|-----------|-----------|-----------|
| N    | 3.559271  | -0.061354 | -2.617168 |
| N    | 3.086069  | -0.585292 | -1.714297 |
| N    | 2.585692  | -1.244545 | -0.776283 |
| S    | 2.164301  | -0.208284 | 0.635816  |
| O    | 2.376447  | -1.083454 | 1.792579  |
| O    | 2.959181  | 1.021581  | 0.484053  |
| C    | 0.385732  | 0.062760  | 0.362284  |
| C    | -0.147508 | 1.378409  | 0.289377  |
| C    | -1.519198 | 1.482623  | -0.000520 |
| C    | -2.351562 | 0.375400  | -0.182437 |
| C    | -1.787259 | -0.899083 | -0.043527 |
| C    | -0.428591 | -1.098383 | 0.230078  |
| C    | 0.622857  | 2.689395  | 0.496515  |
| H    | -1.954530 | 2.475353  | -0.076083 |
| C    | -3.828206 | 0.560115  | -0.502725 |
| H    | -2.422184 | -1.774776 | -0.149465 |
| C    | 0.040480  | -2.548922 | 0.402828  |
| H    | 1.120658  | -2.584019 | 0.521068  |
| C    | -0.554172 | -3.145010 | 1.697269  |
| C    | -0.295452 | -3.414629 | -0.828141 |
| H    | 0.111042  | -4.423461 | -0.690692 |
| H    | -1.375266 | -3.514748 | -0.987423 |
| H    | 0.145992  | -2.993631 | -1.737895 |
| H    | -0.193697 | -4.171314 | 1.835367  |
| H    | -0.250689 | -2.559135 | 2.571188  |
| H    | -1.649883 | -3.173978 | 1.666547  |
| C    | -4.730075 | -0.015095 | 0.609522  |
| H    | -4.015812 | 1.640790  | -0.553579 |
| C    | -4.190674 | -0.039680 | -1.877532 |

|   |           |           |           |
|---|-----------|-----------|-----------|
| H | -5.243339 | 0.155885  | -2.114279 |
| H | -3.574792 | 0.391571  | -2.674677 |
| H | -4.042847 | -1.126161 | -1.890052 |
| H | -5.785069 | 0.184574  | 0.387096  |
| H | -4.609320 | -1.101247 | 0.699722  |
| H | -4.495004 | 0.430536  | 1.582562  |
| C | 1.014488  | 3.304051  | -0.865311 |
| H | 1.546180  | 2.477905  | 1.030826  |
| C | -0.157924 | 3.708041  | 1.352672  |
| H | 1.571756  | 4.235890  | -0.712762 |
| H | 1.651309  | 2.624134  | -1.439999 |
| H | 0.125579  | 3.534500  | -1.465623 |
| H | 0.500360  | 4.550852  | 1.593595  |
| H | -1.031094 | 4.120933  | 0.834770  |
| H | -0.498031 | 3.265455  | 2.295792  |
